# Supplementary material for: Primary therapy and survival among patients with nodular lymphocyte‐predominant Hodgkin lymphoma: a population‐based analysis in the Netherlands, 1993–2016
Source: PubMed Central journal article supplement — Br J Haematol. 2019 Nov 4;189(1):117–21. doi: 10.1111/bjh.16290 (PMC7154721; doi:10.1111/bjh.16290), 2019-11-04
Supplement: BJH-189-117-s001.pdf [file BJH-189-117-s001.pdf]

## **ONLINE APPENDIX**

### **Title**

Primary therapy and survival among patients with nodular lymphocyte-predominant Hodgkin lymphoma: a population-based analysis in the Netherlands, 1993-2016

### **Short title**

Population-based outcomes in NLPHL

### **Authors and affiliations**

Hidde L.A. Posthuma,<sup>1</sup> Josée M. Zijlstra,<sup>1</sup> Otto Visser,<sup>2</sup> Pieterella J. Lugtenburg,<sup>3</sup> Marie José Kersten,<sup>4</sup> Avinash G. Dinmohamed<sup>1,4,6,7</sup>

<sup>1</sup>Amsterdam UMC, Vrije Universiteit Amsterdam, Department of Hematology, Cancer Center Amsterdam, Amsterdam, The Netherlands; <sup>2</sup>Department of Registration, Netherlands Comprehensive Cancer Organisation (IKNL), Utrecht, The Netherlands; <sup>3</sup>Department of Hematology, Erasmus MC Cancer Institute, Rotterdam, The Netherlands; <sup>4</sup>Amsterdam UMC, University of Amsterdam, Department of Hematology, Cancer Center Amsterdam, Amsterdam, The Netherlands; <sup>5</sup>Lymphoma and Myeloma Center Amsterdam (LYMMCARE), Amsterdam, The Netherlands; <sup>6</sup>Department of Research, Netherlands Comprehensive Cancer Organisation (IKNL), Utrecht, The Netherlands; <sup>7</sup>Department of Public Health, Erasmus University Medical Center, Rotterdam, The Netherlands

## **Supplemental methods**

### ***Statistical analyses***

Overall and age- and sex-specific incidence rates were calculated per 1,000,000 person-years using the annual mid-year population size that was obtained from Statistics Netherlands. All aggregated incidence rates were adjusted for age using the European standard population. Seventy-one patients below age 18 at diagnosis were included in the analyses of aggregated incidence rates. This is compatible with international standards for computing overall incidence rates. Age-specific incidence rates were analyzed for the following age groups: 0-19, 20-39, 40-59, and  $\geq 60$  years. In addition, age-specific incidence rates were calculated per quinquennial age groupings of 0-4 years to  $\geq 85$  years. Of note, incidence rates can only be calculated for quinquennial years of age.

The Fisher's exact test for categorical variables and the Kruskal-Wallis test for continuous variables were applied to test for difference between groups.

A generalized linear model (GLM) that assumed a Poisson distribution for the mortality rate was constructed to assess covariates associated with the relative excess risk of mortality during the first ten years after the diagnosis of nodular lymphocyte-predominant Hodgkin lymphoma, with simultaneous adjustment for the following covariates: calendar period of diagnosis, sex, age, stage, and years of follow-up. The ten years of follow-up were split into 2-year time bands. The GLM produces excess mortality ratios (EMRs) with 95% confidence intervals (CIs).

All statistical analyses were performed with STATA Statistical Software Release 14.2 (College Station, TX, U.S.).

## **Supplemental figure legends**

**Supplemental Figure 1.** Age-specific incidence rates of patients with nodular lymphocyte-predominant Hodgkin lymphoma in the Netherlands, 1993-2016. Incidence rates are presented per 1,000,000 person-years for the following age groups: 0-19, 20-39, 40-59, and  $\geq 60$  years. Incidence rates are shown for (A) males and females together, (B) males alone, and (C) females alone.

**Supplemental Figure 2.** Age-specific incidence rates per quinquennial years of age of patients with nodular lymphocyte-predominant Hodgkin lymphoma in the Netherlands, 2003-2016. Incidence rates are presented per 1,000,000 person-years and shown according to sex. The period of 2003-2016 was chosen, as this period in a way represents contemporary clinical practice.

### Supplemental Figure 1

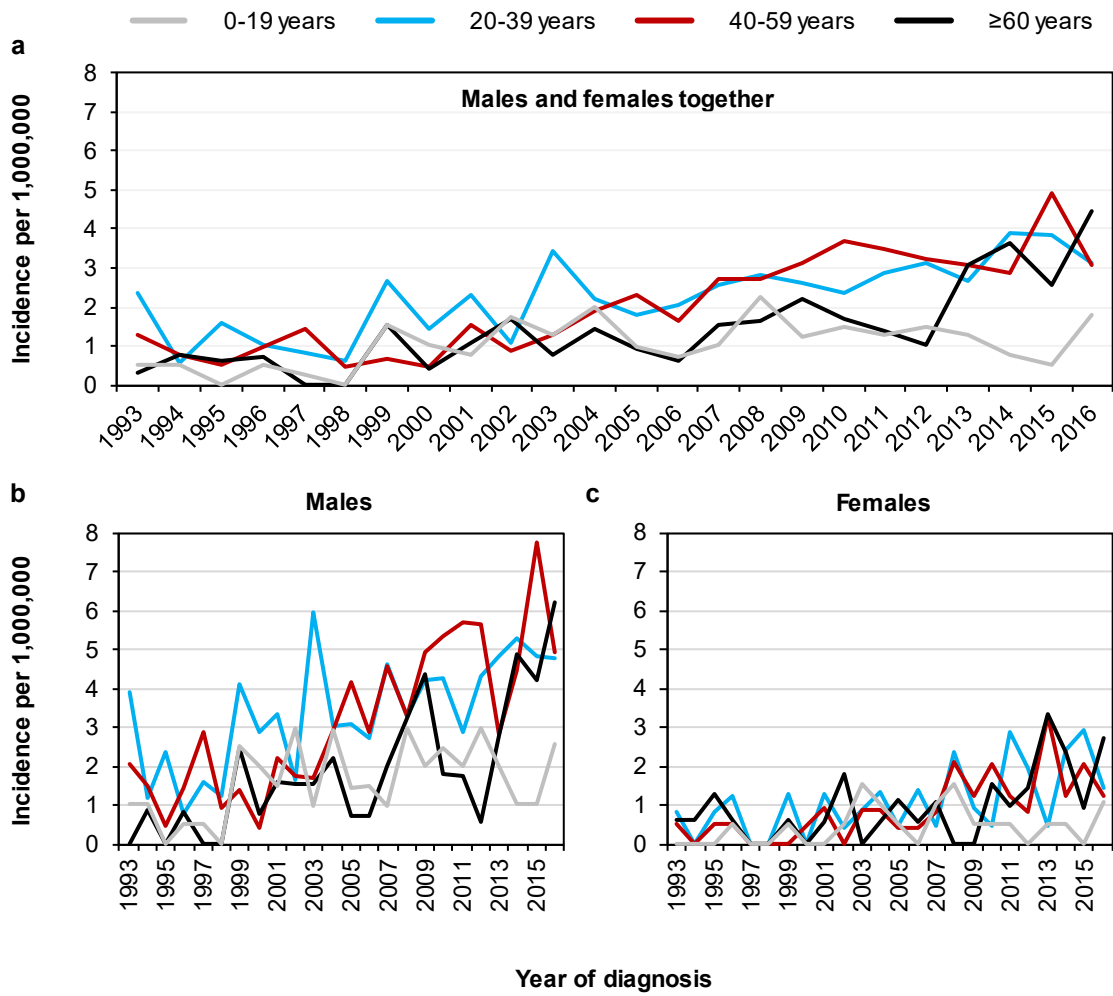

### Supplemental Figure 2

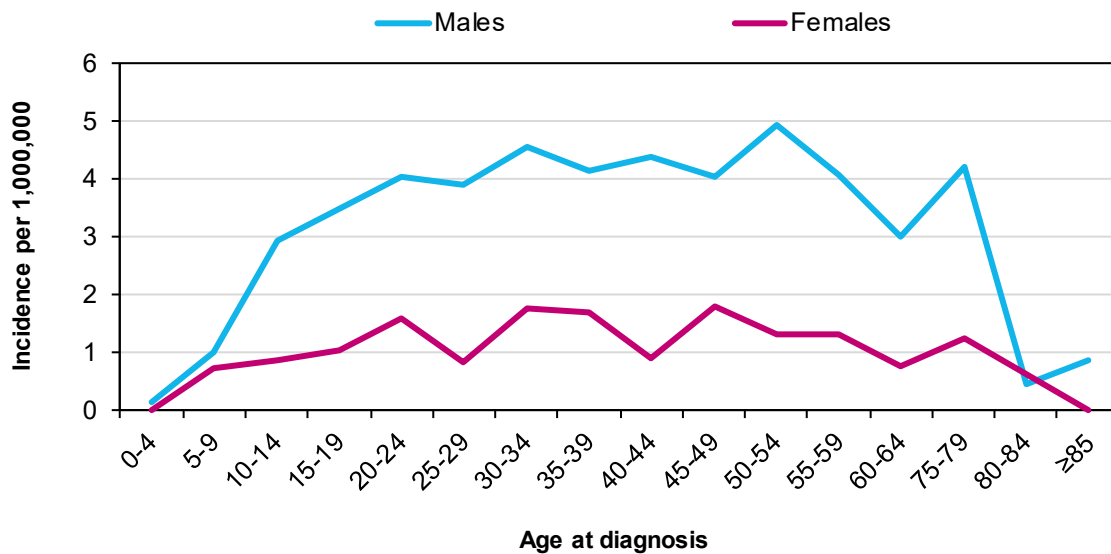

## Supplemental tables

**Supplemental Table 1.** Patient characteristics

| Characteristics              | Calendar period |      |                 |           |      |                 | Total     |      |                 |
|------------------------------|-----------------|------|-----------------|-----------|------|-----------------|-----------|------|-----------------|
|                              | 1993-2002       |      |                 | 2003-2016 |      |                 | No.       | (% ) | IR <sup>a</sup> |
|                              | No.             | (% ) | IR <sup>a</sup> | No.       | (% ) | IR <sup>a</sup> |           |      |                 |
| <b>Total No. of patients</b> | 156             | -    | 1.0             | 531       | -    | 2.2             | 687       | -    | 1.7             |
| <b>Sex</b>                   |                 |      |                 |           |      |                 |           |      |                 |
| Male                         | 123             | (79) | 1.5             | 391       | (74) | 3.3             | 514       | (75) | 2.6             |
| Female                       | 33              | (21) | 0.4             | 140       | (26) | 1.2             | 173       | (25) | 0.9             |
| <b>Age, years</b>            |                 |      |                 |           |      |                 |           |      |                 |
| Median (range)               | 34 (4-77)       |      |                 | 42 (4-87) |      |                 | 40 (4-87) |      |                 |
| 0-17                         | 18              | (12) | 0.7             | 53        | (10) | 1.3             | 71        | (10) | 1.0             |
| 18-39                        | 80              | (51) | 1.4             | 187       | (35) | 2.8             | 267       | (39) | 2.2             |
| 40-59                        | 38              | (24) | 0.9             | 194       | (37) | 2.9             | 232       | (34) | 2.0             |
| ≥60                          | 20              | (13) | 0.7             | 97        | (18) | 1.9             | 117       | (17) | 1.4             |
| <b>Ann Arbor stage</b>       |                 |      |                 |           |      |                 |           |      |                 |
| I                            | 95              | (61) |                 | 239       | (45) |                 | 334       | (49) |                 |
| II                           | 34              | (22) |                 | 143       | (27) |                 | 177       | (26) |                 |
| III                          | 17              | (11) |                 | 102       | (19) |                 | 119       | (17) |                 |
| IV                           | 3               | (2)  |                 | 41        | (8)  |                 | 44        | (6)  |                 |
| Unknown                      | 7               | (4)  |                 | 6         | (1)  |                 | 13        | (2)  |                 |
| <b>B symptoms</b>            |                 |      |                 |           |      |                 |           |      |                 |
| No                           | 69              | (44) |                 | 409       | (77) |                 | 478       | (70) |                 |
| Yes                          | 10              | (6)  |                 | 59        | (11) |                 | 69        | (10) |                 |
| Unknown                      | 77              | (49) |                 | 63        | (12) |                 | 140       | (20) |                 |

Abbreviation: IR, incidence rate.

<sup>a</sup>Incidence rates are presented per 1,000,000 person-years. The overall and sex-specific incidence rates are standardized as per the European standard population.

**Supplemental Table 2.** Primary therapy of adult patients with nodular lymphocyte-predominant Hodgkin lymphoma in the Netherlands according to stage at diagnosis, age at diagnosis, and calendar period of diagnosis, 1993-2016

| Stage        | Age, years | Calendar period  | Primary therapy   |             |                   |             |                            |             |                |            | Total<br>N |
|--------------|------------|------------------|-------------------|-------------|-------------------|-------------|----------------------------|-------------|----------------|------------|------------|
|              |            |                  | Chemotherapy only |             | Radiotherapy only |             | No anti-neoplastic therapy |             | Rituximab only |            |            |
|              |            |                  | N                 | (%)         | N                 | (%)         | N                          | (%)         | N              | (%)        | N          |
| Stage I-II   | 18-39      | 1993-2002        | 9                 | (13)        | 50                | (75)        | 8                          | (12)        | 0              | -          | 67         |
|              |            | 2003-2016        | 21                | (14)        | 81                | (55)        | 39                         | (27)        | 6              | (4)        | 147        |
|              |            | <b>1993-2016</b> | <b>30</b>         | <b>(14)</b> | <b>131</b>        | <b>(61)</b> | <b>47</b>                  | <b>(22)</b> | <b>6</b>       | <b>(3)</b> | <b>214</b> |
|              | 40-59      | 1993-2002        | 4                 | (13)        | 17                | (55)        | 10                         | (32)        | 0              | -          | 31         |
|              |            | 2003-2016        | 19                | (15)        | 67                | (54)        | 37                         | (30)        | 0              | -          | 123        |
|              |            | <b>1993-2016</b> | <b>23</b>         | <b>(15)</b> | <b>84</b>         | <b>(55)</b> | <b>47</b>                  | <b>(31)</b> | <b>0</b>       | <b>-</b>   | <b>154</b> |
|              | ≥60        | 1993-2002        | 2                 | (14)        | 8                 | (57)        | 4                          | (29)        | 0              | -          | 14         |
|              |            | 2003-2016        | 11                | (19)        | 26                | (44)        | 22                         | (37)        | 0              | -          | 59         |
|              |            | <b>1993-2016</b> | <b>13</b>         | <b>(18)</b> | <b>34</b>         | <b>(47)</b> | <b>26</b>                  | <b>(36)</b> | <b>0</b>       | <b>-</b>   | <b>73</b>  |
|              | All ages   | 1993-2002        | 15                | (13)        | 75                | (67)        | 22                         | (20)        | 0              | -          | 112        |
|              |            | 2003-2016        | 51                | (16)        | 174               | (53)        | 98                         | (30)        | 6              | (2)        | 329        |
|              |            | <b>1993-2016</b> | <b>66</b>         | <b>(15)</b> | <b>249</b>        | <b>(56)</b> | <b>120</b>                 | <b>(27)</b> | <b>6</b>       | <b>(1)</b> | <b>441</b> |
| Stage III-IV | 18-39      | 1993-2002        | 6                 | (75)        | 0                 | -           | 2                          | (25)        | 0              | -          | 8          |
|              |            | 2003-2016        | 30                | (79)        | 2                 | (5)         | 6                          | (16)        | 0              | -          | 38         |
|              |            | <b>1993-2016</b> | <b>36</b>         | <b>(78)</b> | <b>2</b>          | <b>(4)</b>  | <b>8</b>                   | <b>(17)</b> | <b>0</b>       | <b>-</b>   | <b>46</b>  |
|              | 40-59      | 1993-2002        | 5                 | (83)        | 0                 | -           | 1                          | (17)        | 0              | -          | 6          |
|              |            | 2003-2016        | 59                | (86)        | 1                 | (1)         | 7                          | (10)        | 2              | (3)        | 69         |
|              |            | <b>1993-2016</b> | <b>64</b>         | <b>(85)</b> | <b>1</b>          | <b>(1)</b>  | <b>8</b>                   | <b>(11)</b> | <b>2</b>       | <b>(3)</b> | <b>75</b>  |
|              | ≥60        | 1993-2002        | 5                 | (100)       | 0                 | -           | 0                          | -           | 0              | -          | 5          |
|              |            | 2003-2016        | 20                | (56)        | 1                 | (3)         | 13                         | (36)        | 2              | (6)        | 36         |
|              |            | <b>1993-2016</b> | <b>25</b>         | <b>(61)</b> | <b>1</b>          | <b>(2)</b>  | <b>13</b>                  | <b>(32)</b> | <b>2</b>       | <b>(5)</b> | <b>41</b>  |
|              | All ages   | 1993-2002        | 16                | (84)        | 0                 | -           | 3                          | (16)        | 0              | -          | 19         |
|              |            | 2003-2016        | 109               | (76)        | 4                 | (3)         | 26                         | (18)        | 4              | (3)        | 143        |
|              |            | <b>1993-2016</b> | <b>125</b>        | <b>(77)</b> | <b>4</b>          | <b>(2)</b>  | <b>29</b>                  | <b>(18)</b> | <b>4</b>       | <b>(2)</b> | <b>162</b> |

**Supplemental Table 3.** Primary therapy of adult patients with nodular lymphocyte-predominant Hodgkin lymphoma in the Netherlands according to stage and age at diagnosis, 2014-2016

| Stage  | Age, years      | Primary therapy |             |          |            |          |            |          |            |          |            |           |             | Total<br>N |             |           |
|--------|-----------------|-----------------|-------------|----------|------------|----------|------------|----------|------------|----------|------------|-----------|-------------|------------|-------------|-----------|
|        |                 | ABVD            |             | BEACOPP  |            | R-CHOP   |            | R-CVP    |            | R-mono   |            | RT only   |             |            | No therapy  |           |
|        |                 | N               | (%)         | N        | (%)        | N        | (%)        | N        | (%)        | N        | (%)        | N         | (%)         | N          | (%)         | N         |
| I-II   | 18-39           | 6               | (18)        | 0        | -          | 1        | (3)        | 0        | -          | 0        | -          | 21        | (64)        | 5          | (15)        | 33        |
|        | 40-59           | 5               | (17)        | 0        | -          | 0        | -          | 0        | -          | 0        | -          | 19        | (63)        | 6          | (20)        | 30        |
|        | ≥60             | 2               | (8)         | 0        | -          | 0        | -          | 0        | -          | 0        | -          | 10        | (40)        | 13         | (52)        | 25        |
|        | <b>All ages</b> | <b>13</b>       | <b>(15)</b> | <b>0</b> | <b>-</b>   | <b>1</b> | <b>(1)</b> | <b>0</b> | <b>-</b>   | <b>0</b> | <b>-</b>   | <b>50</b> | <b>(57)</b> | <b>24</b>  | <b>(27)</b> | <b>88</b> |
| III-IV | 18-39           | 11              | (73)        | 0        | -          | 2        | (13)       | 0        | -          | 0        | -          | 1         | (7)         | 1          | (7)         | 15        |
|        | 40-59           | 16              | (70)        | 1        | (4)        | 1        | (4)        | 0        | -          | 2        | (9)        | 0         | -           | 3          | (13)        | 23        |
|        | ≥60             | 6               | (35)        | 0        | -          | 2        | (12)       | 2        | (12)       | 1        | (6)        | 0         | -           | 6          | (35)        | 17        |
|        | <b>All ages</b> | <b>33</b>       | <b>(60)</b> | <b>1</b> | <b>(2)</b> | <b>5</b> | <b>(9)</b> | <b>2</b> | <b>(4)</b> | <b>3</b> | <b>(5)</b> | <b>1</b>  | <b>(2)</b>  | <b>10</b>  | <b>(18)</b> | <b>55</b> |

Abbreviations: ABVD, doxorubicin, bleomycin, vinblastine, and dacarbazine; BEACOPP, bleomycin, etoposide, doxorubicin, cyclophosphamide, vincristine, procarbazine, and prednisone; R-CHOP, rituximab with cyclophosphamide, doxorubicin, vincristine, and prednisone; R-CVP, rituximab with cyclophosphamide, vincristine, and prednisone; R-mono, rituximab monotherapy; and RT, radiotherapy.

<sup>a</sup>Overall, ABVD was combined with rituximab in 26 (57%) of 46 patients

<sup>b</sup>Rituximab was not added to BEACOPP

**Supplemental Table 4.** Excess mortality ratio during the first ten years after the diagnosis of nodular lymphocyte-predominant Hodgkin lymphoma

| Covariate                      | P for LRT <sup>a</sup> | EMR <sup>b</sup> | 95% CI |   |       | P <sup>b</sup> |
|--------------------------------|------------------------|------------------|--------|---|-------|----------------|
| <b>Period of diagnosis</b>     | 0.891                  |                  |        |   |       |                |
| 1993-2002                      |                        | 1                | (ref)  |   |       |                |
| 2003-2016                      |                        | 1.08             | 0.33   | - | 3.52  | 0.892          |
| <b>Sex</b>                     | 0.477                  |                  |        |   |       |                |
| Male                           |                        | 1                | (ref)  |   |       |                |
| Female                         |                        | 0.71             | 0.27   | - | 1.87  | 0.491          |
| <b>Age at diagnosis, years</b> | 0.005                  |                  |        |   |       |                |
| 18-39                          |                        | 0.15             | 0.03   | - | 0.74  | 0.020          |
| 40-59                          |                        | 1                | (ref)  |   |       |                |
| ≥60                            |                        | 1.24             | 0.45   | - | 3.41  | 0.674          |
| <b>Stage</b>                   | <0.001                 |                  |        |   |       |                |
| I-II                           |                        | 1                | (ref)  |   |       |                |
| III-IV                         |                        | 6.12             | 2.21   | - | 16.93 | <0.001         |

Abbreviations: LRT, likelihood ratio test; EMR, excess mortality ratio; and CI, confidence interval.

<sup>a</sup>P-values for the likelihood ratio test that compares the model without the specific covariate with the model containing all covariates.

<sup>b</sup>All covariates are simultaneously adjusted.

<sup>c</sup>P-values are compared with the reference category.

**Supplemental Table 5.** The projected 5- and 10-year overall survival among adult patients with nodular lymphocyte-predominant Hodgkin lymphoma in the Netherlands according to primary therapy and stage, 1993-2016

| Primary therapy  | Time    | Stage I-II |        |        | Stage III-IV |        |       |
|------------------|---------|------------|--------|--------|--------------|--------|-------|
|                  |         | OS         | 95% CI |        | OS           | 95% CI |       |
| CIT              | 5-year  | 84%        | 47%    | - 96%  | 87%          | 73%    | - 94% |
|                  | 10-year | 84%        | 47%    | - 96%  |              |        |       |
| CT +/- RT        | 5-year  | 90%        | 77%    | - 96%  | 90%          | 80%    | - 95% |
|                  | 10-year | 90%        | 77%    | - 96%  | 82%          | 68%    | - 90% |
| CT +/- IT +/- RT | 5-year  | 89%        | 77%    | - 95%  | 89%          | 82%    | - 94% |
|                  | 10-year | 89%        | 77%    | - 95%  | 80%          | 67%    | - 88% |
| R-mono           | 5-year  | 100%       |        |        |              |        |       |
|                  | 10-year | 100%       |        |        |              |        |       |
| RT alone         | 5-year  | 99%        | 96%    | - 100% | 100%         |        |       |
|                  | 10-year | 99%        | 96%    | - 100% | 100%         |        |       |
| No therapy       | 5-year  | 93%        | 87%    | - 97%  | 61%          | 39%    | - 77% |
|                  | 10-year | 80%        | 69%    | - 87%  | 57%          | 35%    | - 74% |

Abbreviations: OS, overall survival; CI, confidence interval; CIT, chemoimmunotherapy; CT, chemotherapy; RT, radiotherapy; and R-mono, rituximab monotherapy.
